# Supplementary material for: Urokinase-Type Plasminogen Activator Enhances the Neuroprotective Activity of Brain-Derived Neurotrophic Factor in a Model of Intracerebral Hemorrhage
Source: MDPI journal article supplement (doi:10.3390/biomedicines10061346), 2022-06-08
Supplement: s1 [file s1]

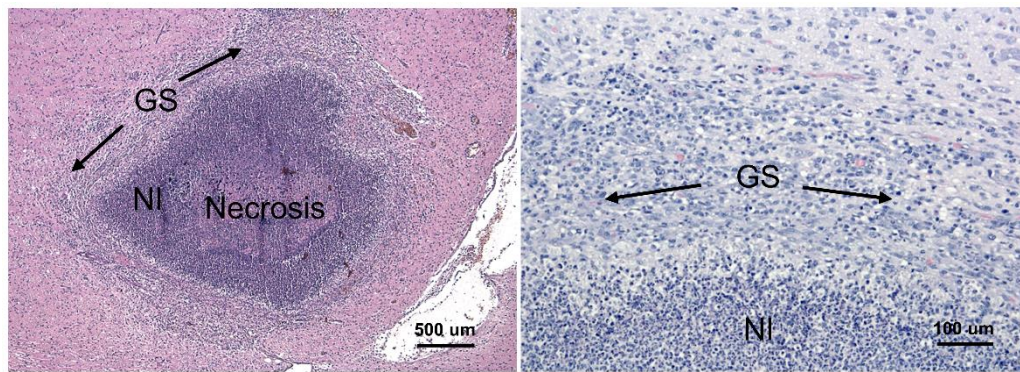

**Figure S1.** Histological signs of brain tissue damage (hematoxylin-eosin): In (A and B), a necrosis focus restrained by neutrophil infiltration (NI) and a glial scar (GS).

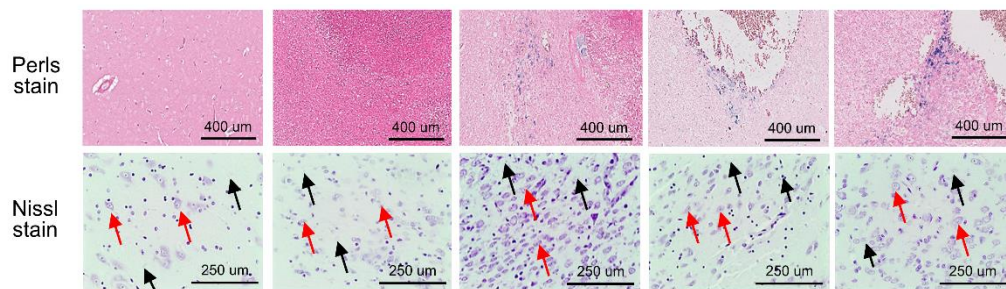

**Figure S2.** Histological examination of brain slices. Perl's stain reveals hemosiderin deposits adjacent to the hemorrhage site (blue grains). Nissl stains reflect the functional state of neurons in the penumbra: red arrows for alive though hypoxic neurons, black arrows for dead neurons (neuron shadows).

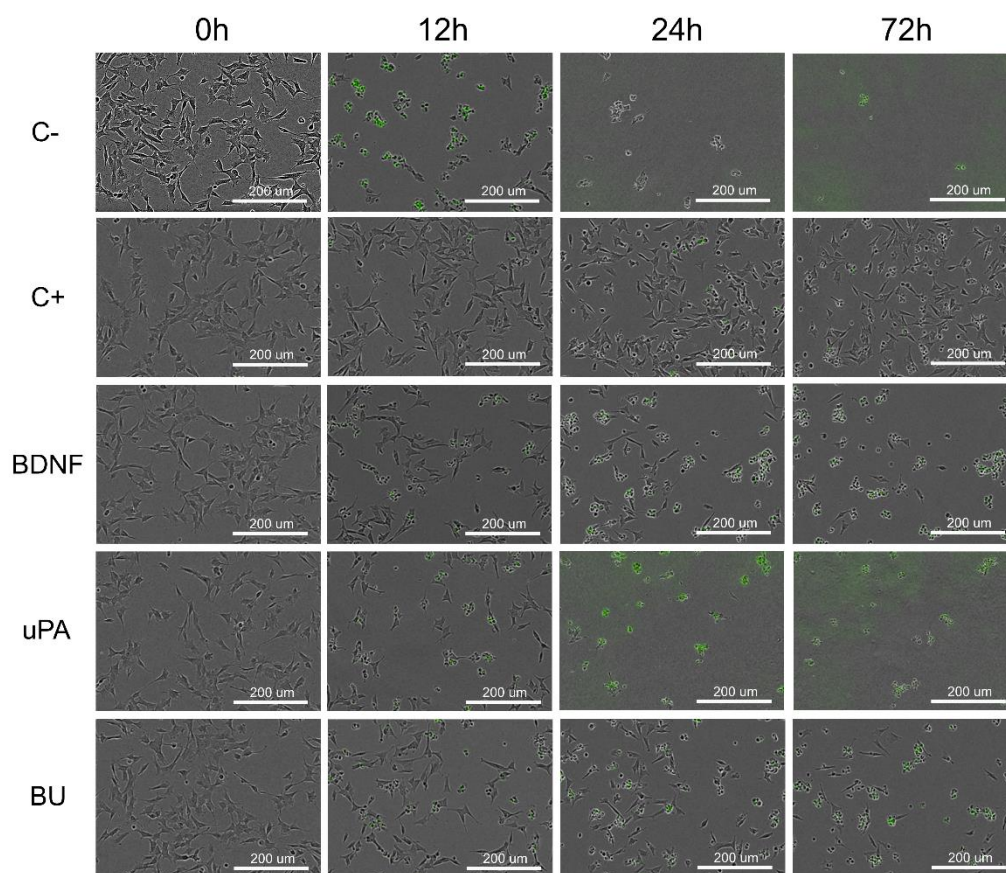

**Figure S3.** Samples of images (raw data) obtained during the study of neuroprotective activity of BDNF, uPA and BU medium samples in the model of in vitro glutamate-mediated excitotoxicity. Green stain marks dead cells (apoptosis).

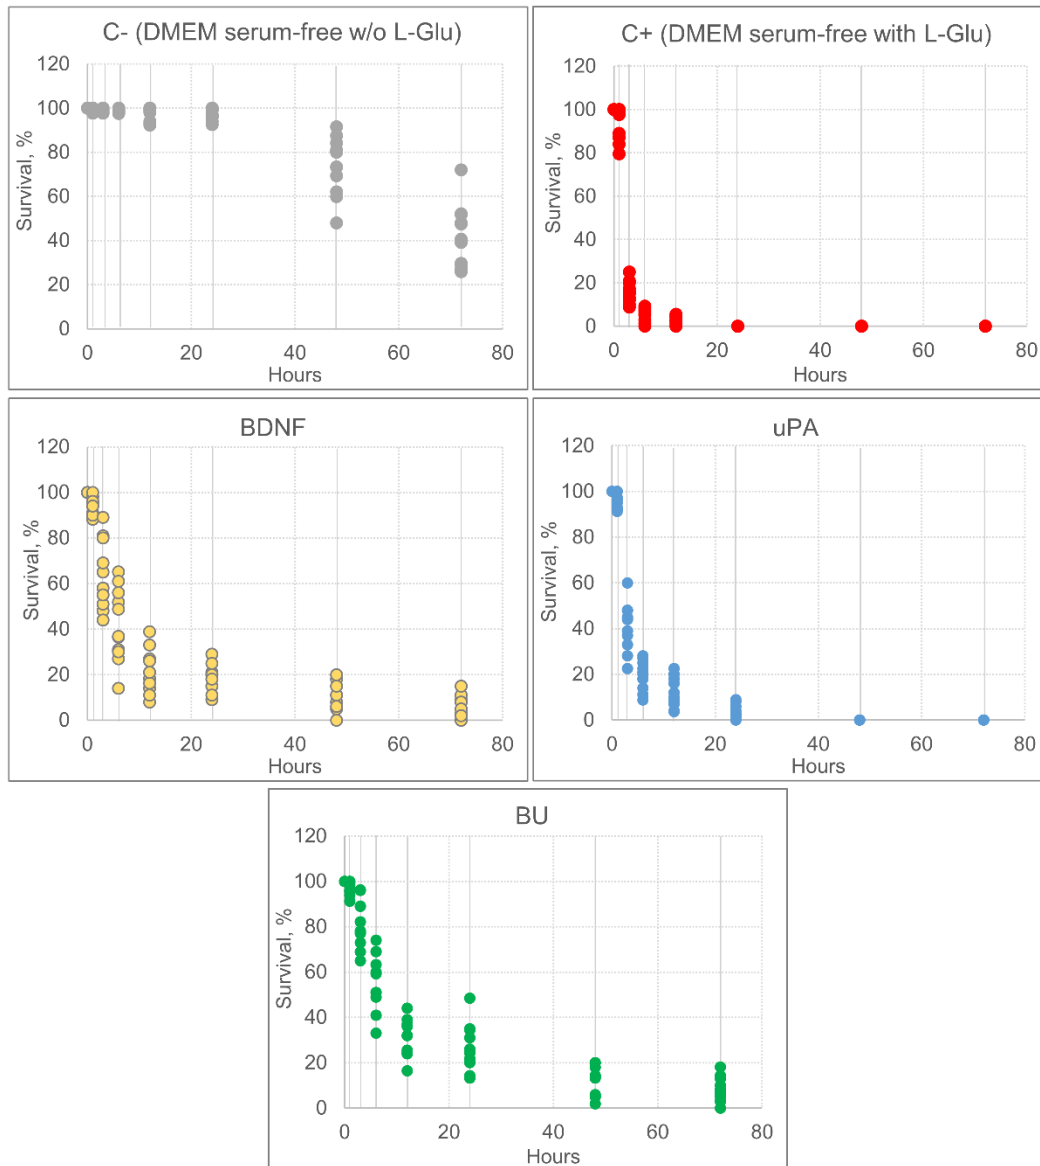

**Figure S4.** Brain-derived neurotrophic factor (BDNF), urokinase-type plasminogen activator (uPA) and their combination support the survival of SH-SY5Y neuroblastoma cells under glutamate-excitotoxic conditions (scatter plots).

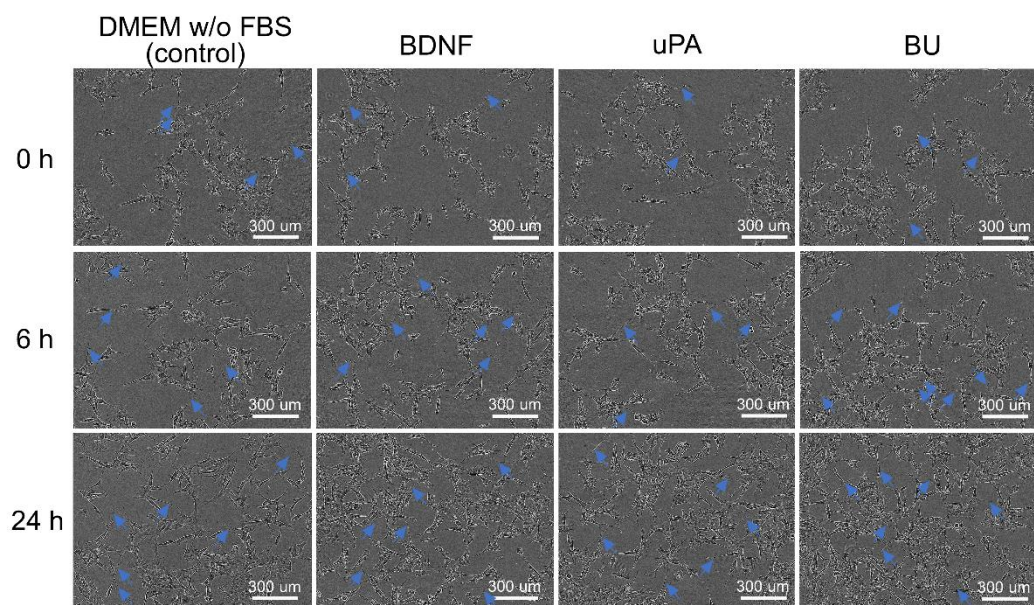

**Figure S5.** Samples of images (raw data) obtained during the study of ability of BDNF, uPA and BU medium samples to stimulate neuritogenesis. Blue arrows mark the neurites.
